# Supplementary material
Source: publisher site journal article supplement (https://www.dovepress.com/article/533996)
Supplement: Supplementary file 1 [file 533996%20Supplementary%20Material.docx]

# Supplementary Tables

**Supplementary Table 1** Potential SHI members based on a 2013 labor force survey and estimates from Ethiopian Health Insurance Agency

| Sector | Number of employees  (Share of total in %) | Sample distribution-*Planned*  (Share of total in %) | Sample distribution-*Achieved*  (Share in total in %) |
| --- | --- | --- | --- |
| Government worker/civil servant a | 1,410,572  (32.8) | 690  (32.8) | 637  (33.2) |
| Public sector enterprise b | 424,039  (9.9) | 208  (9.9) | 191  (9.9) |
| Private sector enterprise b | 1,789,963  (41.7) | 872  (41.5) | 757  (39.4) |
| NGO workers b | 84,808  (1.98) | 42  (2.0) | 39  (2.0) |
| Civil servant/public sector enterprise pensioners a | 590,024  (13.75) | 289  (13.76) | 295  (15.4) |
| Total | 4,290,406 | 2,101 | 1,919 |

**Notes:** a From EHIA, actual number of employees in May 2016; bEstimated from Central Statistical Office, labor force survey

**Supplementary Table 2** CBHI scenarios presented to the survey instruments

| **Case 1** |
| --- |
| a. Have you heard of the Community Based Health Insurance Scheme which offers health insurance to rural households and those working in the informal sector? (1 = Yes, 2 = No). |
| b. Do you oppose or support this scheme? (1 = strongly opposed, 2 = opposed, 3 = neither oppose nor support, 4 = support, 5 = strongly support). |
| **Case 2** |
| a. Have you heard of the Community Based Health Insurance Scheme which offers health insurance to rural households and those working in the informal sector? (1 = Yes, 2 = No). |
| b. The scheme allows all those who enroll to access health services for a premium of 15 Birr per month. This is the premium that needs to be paid for the entire household. In addition, the government pays a subsidy of 5 Birr per month for each household that enrolls and 10% of indigent households get a complete fee waiver. The costs of this subsidy will be borne by those working in the formal sector/taxpayers. |
| c. Do you oppose or support this scheme? (1 = strongly opposed, 2 =opposed, 3 = neither oppose nor support, 4 = support, 5 = strongly support). |
| **Case 3** |
| a. Have you heard of the Community Based Health Insurance Scheme which offers health insurance to rural households and those working in the informal sector? (1 = Yes, 2 = No). |
| b. The scheme allows all those who enroll to access health services for a premium of 15 Birr per month. This is the premium that needs to be paid for the entire household. In addition, the government pays a subsidy of 5 Birr per month for each household that enrolls and 10% of indigent households get a complete fee waiver. The costs of this subsidy will be borne by international donors. |
| c. Do you oppose or support this scheme? (1 = strongly opposed, 2 = opposed, 3 = neither oppose nor support, 4 = support, 5 = strongly support). |
| **Case 4** |
| a. Have you heard of the Community Based Health Insurance Scheme which offers health insurance to rural households and those working in the informal sector? (1 = Yes, 2 = No). |
| b. The scheme allows all those who enroll to access health services for a premium of 15 Birr per month. This is the premium that needs to be paid for the entire household. In addition, the government pays a subsidy of 5 Birr per month for each household and 10% of indigent households get a complete fee waiver. The costs of this subsidy will be borne by those working in the formal sector/taxpayers.  Research finds that almost 50% of those who were offered the insurance have joined the scheme. The use of health care has increased by 50-60 percent and per health care visit, households pay 60% less than they were paying before they had insurance. |
| c. Do you oppose or support this scheme? (1 = strongly opposed, 2 = opposed, 3 = neither oppose nor support, 4 = support, 5 = strongly support). |
| **Case 5** |
| a. Have you heard of the Community Based Health Insurance Scheme which offers health insurance to rural households and those working in the informal sector? (1 = Yes, 2 = No). |
| b. The effectiveness of the scheme has been studied and research finds that almost 50% of those who were offered the insurance have joined the scheme. The use of health care has increased by 50-60 percent and per health care visit, households pay 60% less than they were paying before they had insurance. |
| c. Do you oppose or support this scheme? (1 = strongly opposed, 2 = opposed, 3 = neither oppose nor support, 4 = support, 5 = strongly support). |
| **A follow up question to all cases** |
| For all those who support or strongly support the scheme (that is, response 4 or 5) ask if they are willing to endorse continued government support of the scheme by signing a slip of paper and placing their signature in a box (1 = Yes, 2 = No). |

**Supplementary Table 3** Comparing profiles of study participants across cases (Kruskal–Wallis test)

|  | **Case 1** | **Case 2** | **Case 3** | **Case 4** | **Case 5** | **Chi2** | **P-value** |
| --- | --- | --- | --- | --- | --- | --- | --- |
| Sex of the respondent-male | 0.635 | 0.651 | 0.644 | 0.646 | 0.629 | 0.582 | 0.9651 |
| Age group-less than 30 | 0.272 | 0.299 | 0.265 | 0.286 | 0.273 | 3.339 | 0.5028 |
| Age group-30 - 39 | 0.319 | 0.326 | 0.329 | 0.265 | 0.288 |
| Age group- 40 - 49 | 0.187 | 0.177 | 0.197 | 0.215 | 0.236 |
| Age group- 50+ | 0.223 | 0.198 | 0.209 | 0.234 | 0.202 |
| Education level-No education | 0.013 | 0.012 | 0.009 | 0.012 | 0.004 | 4.654 | 0.3247 |
| Education level-Primary | 0.104 | 0.087 | 0.124 | 0.089 | 0.075 |
| Education level-Secondary | 0.117 | 0.157 | 0.191 | 0.129 | 0.169 |
| Education level-Post  Secondary | 0.764 | 0.738 | 0.674 | 0.766 | 0.745 |
| Education level-Other & informal | 0.003 | 0.006 | 0.003 | 0.003 | 0.007 |
| Marital status-Married | 0.592 | 0.616 | 0.582 | 0.657 | 0.630 | 5.272 | 0.2605 |
| Marital status-Single | 0.281 | 0.270 | 0.282 | 0.259 | 0.249 |
| Marital status-Divorced | 0.055 | 0.052 | 0.071 | 0.052 | 0.042 |
| Marital status-Widowed | 0.073 | 0.061 | 0.065 | 0.031 | 0.079 |
| Religion-Orthodox | 0.813 | 0.799 | 0.775 | 0.783 | 0.789 | 3.344 | 0.5021 |
| Religion-Protestant | 0.148 | 0.142 | 0.166 | 0.173 | 0.170 |
| Religion-Muslim | 0.031 | 0.052 | 0.047 | 0.037 | 0.030 |
| Religion -Other religion | 0.008 | 0.006 | 0.012 | 0.006 | 0.011 |
| Ethnicity-Amhara | 0.462 | 0.453 | 0.448 | 0.450 | 0.519 | 3.988 | 0.4076 |
| Ethnicity-Oromo | 0.178 | 0.159 | 0.211 | 0.168 | 0.199 |
| Ethnicity-Tigrie | 0.207 | 0.247 | 0.202 | 0.217 | 0.128 |
| Ethnicity-Guragie | 0.050 | 0.056 | 0.050 | 0.056 | 0.053 |
| Ethnicity-Other ethnic | 0.102 | 0.085 | 0.089 | 0.109 | 0.102 |
| Monthly income a | 5775.1 | 5524.0 | 6087.7 | 5692.2 | 5675.9 | 0.340 | 0.8510 |
|  | (4780.9) | (4921.1) | (9175.0) | (7035.5) | (6210.2) |  |  |
| Own house | 0.383 | 0.372 | 0.363 | 0.425 | 0.386 | 1.908 | 0.7526 |
| Household size - 1 | 0.254 | 0.250 | 0.241 | 0.255 | 0.255 | 0.814 | 0.9366 |
| Household size – 2-3 | 0.334 | 0.314 | 0.318 | 0.305 | 0.326 |
| Household size – 4-5 | 0.306 | 0.375 | 0.329 | 0.348 | 0.300 |
| Household size – 6+ | 0.106 | 0.061 | 0.112 | 0.092 | 0.120 |
| Any illness in the household | 0.280 | 0.294 | 0.341 | 0.246 | 0.285 | 6.917 | 0.1403 |
| Household outpatient care use | 0.264 | 0.267 | 0.324 | 0.268 | 0.255 | 4.427 | 0.3513 |
| Household member smokes | 0.037 | 0.021 | 0.035 | 0.028 | 0.030 | 1.671 | 0.7961 |
| Household member drinks | 0.501 | 0.472 | 0.478 | 0.461 | 0.445 | 1.915 | 0.7514 |
| Household member has khat | 0.031 | 0.053 | 0.041 | 0.037 | 0.042 | 1.808 | 0.7711 |
| Insurance membership | 0.522 | 0.496 | 0.500 | 0.500 | 0.496 | 0.686 | 0.9530 |
| Sector-Public sector | 0.339 | 0.358 | 0.356 | 0.345 | 0.363 | 0.575 | 0.9658 |
| Sector-Public enterprises | 0.096 | 0.102 | 0.100 | 0.120 | 0.101 |
| Sector-Private and NGO | 0.438 | 0.410 | 0.409 | 0.409 | 0.419 |
| Sector-Pension | 0.127 | 0.131 | 0.135 | 0.126 | 0.116 |
| Region – Tigray | 0.174 | 0.195 | 0.153 | 0.169 | 0.079 | 5.059 | 0.2813 |
| Region – Addis Ababa | 0.518 | 0.480 | 0.509 | 0.486 | 0.513 |
| Region – Amhara | 0.124 | 0.134 | 0.138 | 0.132 | 0.172 |
| Region – Oromia | 0.021 | 0.026 | 0.024 | 0.022 | 0.019 |
| Region – SNNPR | 0.163 | 0.166 | 0.176 | 0.191 | 0.217 |
| *N* | *386* | *344* | *340* | *325* | *267* |  |  |

**Notes**: a Standard deviations are in parentheses. Differences in mean income by group is based on an analysis of variance (ANOVA) test. Of 1919 respondents, 257 did not respond to the question on supporting CBHI.

**Supplementary Table 4** Comparison of who responded to the CBHI case questions and those who did not (Two-sample test of proportions)

|  | **Responded to the cases** | **Did not respond to the cases** | **P-value** |
| --- | --- | --- | --- |
| Sex of the respondent-male | 0.641 | 0.630 | 0.7314 |
| Age group-less than 30 | 0.279 | 0.222 | 0.0542 |
| Age group-30 - 39 | 0.307 | 0.280 | 0.3861 |
| Age group- 40 - 49 | 0.200 | 0.156 | 0.0918 |
| Age group- 50+ | 0.214 | 0.342 | 0.0000 |
| Education level-No education | 0.010 | 0.024 | 0.0639 |
| Education level-Primary | 0.097 | 0.171 | 0.0004 |
| Education level-Secondary | 0.151 | 0.203 | 0.0346 |
| Education level-Post-secondary | 0.738 | 0.598 | 0.0000 |
| Education level-Other & informal | 0.004 | 0.004 | 0.9584 |
| Marital status-Married | 0.614 | 0.641 | 0.4145 |
| Marital status-Single | 0.270 | 0.199 | 0.0169 |
| Marital status-Divorced | 0.055 | 0.070 | 0.3215 |
| Marital status-Widowed | 0.062 | 0.090 | 0.0878 |
| Religion-Orthodox | 0.793 | 0.856 | 0.0180 |
| Religion-Protestant | 0.159 | 0.117 | 0.0807 |
| Religion-Muslim | 0.040 | 0.016 | 0.0535 |
| Religion -Other religion | 0.008 | 0.012 | 0.6096 |
| Ethnicity-Amhara | 0.464 | 0.357 | 0.0014 |
| Ethnicity-Oromo | 0.182 | 0.153 | 0.2551 |
| Ethnicity-Tigrie | 0.204 | 0.392 | 0.0000 |
| Ethnicity-Guragie | 0.053 | 0.012 | 0.0040 |
| Ethnicity-Other ethnic | 0.097 | 0.086 | 0.5809 |
| Income quintile - poor | 0.308 | 0.420 | 0.0003 |
| Income quintile - medium | 0.337 | 0.311 | 0.4204 |
| Income quintile - rich | 0.355 | 0.268 | 0.0063 |
| Own house | 0.385 | 0.475 | 0.0064 |
| Household size - 1 | 0.251 | 0.233 | 0.5472 |
| Household size – 2-3 | 0.319 | 0.331 | 0.7193 |
| Household size – 4-5 | 0.332 | 0.331 | 0.9649 |
| Household size – 6+ | 0.097 | 0.105 | 0.7041 |
| Any illness in the household | 0.290 | 0.237 | 0.0835 |
| Household outpatient care utilization | 0.276 | 0.237 | 0.1926 |
| Household member smokes | 0.030 | 0.028 | 0.8201 |
| Household member drinks | 0.474 | 0.530 | 0.0969 |
| Household member has khat | 0.041 | 0.032 | 0.4950 |
| Insurance membership | 0.504 | 0.579 | 0.0272 |
| Sector-Public sector | 0.351 | 0.206 | 0.0000 |
| Sector-Public enterprises | 0.103 | 0.074 | 0.1407 |
| Sector-Private and NGO | 0.418 | 0.397 | 0.5311 |
| Sector-Pension | 0.128 | 0.323 | 0.0000 |
| Region – Tigray | 0.158 | 0.370 | 0.0000 |
| Region – Addis Ababa | 0.501 | 0.529 | 0.4038 |
| Region – Amhara | 0.138 | 0.019 | 0.0000 |
| Region – Oromia | 0.022 | 0.035 | 0.213 |
| Region – SNNPR | 0.181 | 0.047 | 0.0000 |
| *N* | *1,662* | *257* |  |
